# Supplementary material for: Upper tract urothelial carcinoma has a luminal-papillary T-cell depleted contexture and activated FGFR3 signaling
Source: PubMed Central journal article supplement (PMC6611775; doi:10.1038/s41467-019-10873-y), 2019-07-05
Supplement: 41467_2019_10873_MOESM1_ESM.pdf [file 41467_2019_10873_MOESM1_ESM.pdf]

Supplementary information to:

Upper tract urothelial carcinoma has a luminal-  
papillary T-cell depleted contexture and  
activated FGFR3 signaling.

by Robinson, Vlachostergios et al.

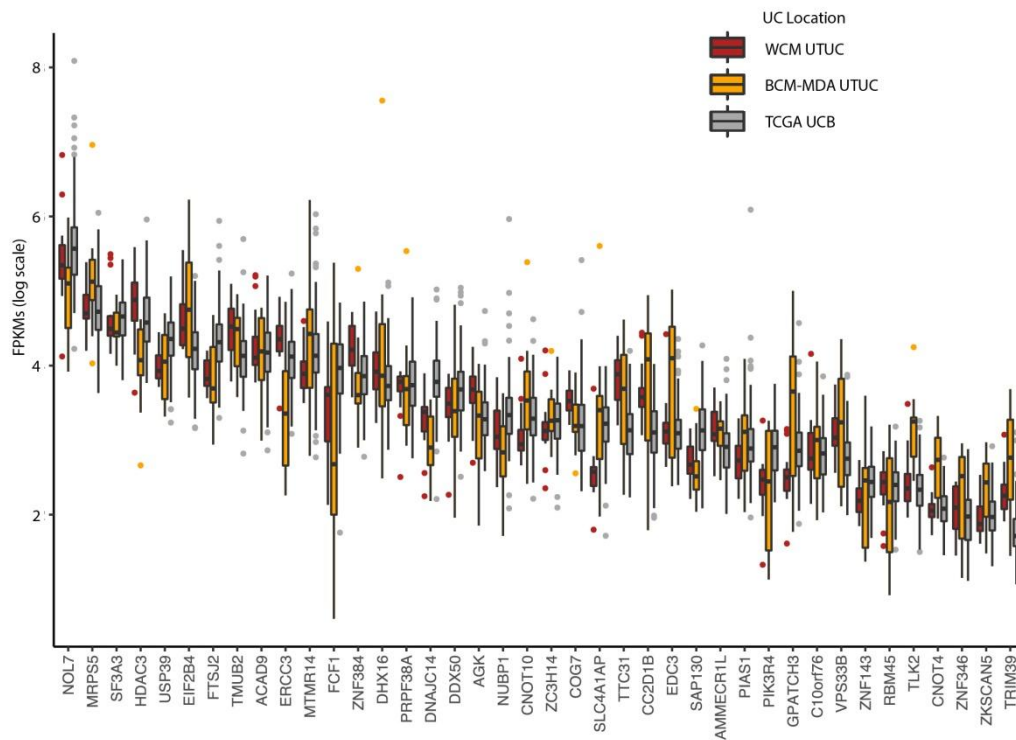

**Supplementary Figure 1 Expression of housekeeping genes is similar across WCM UTUC, BCM-MDA UTUC, and TCGA UCB samples.** Boxplot showing z-scores of the mRNA expression of 40 housekeeping genes among tumor samples from WCM UTUC (red bars), BCM-MDA UTUC (yellow bars) and TCGA UCB (gray bars) cohorts. The horizontal line within the box indicates the mean, boundaries of the box indicate the 25<sup>th</sup>- and 75<sup>th</sup>-percentile, and the whiskers indicate the highest and lowest values of the results.

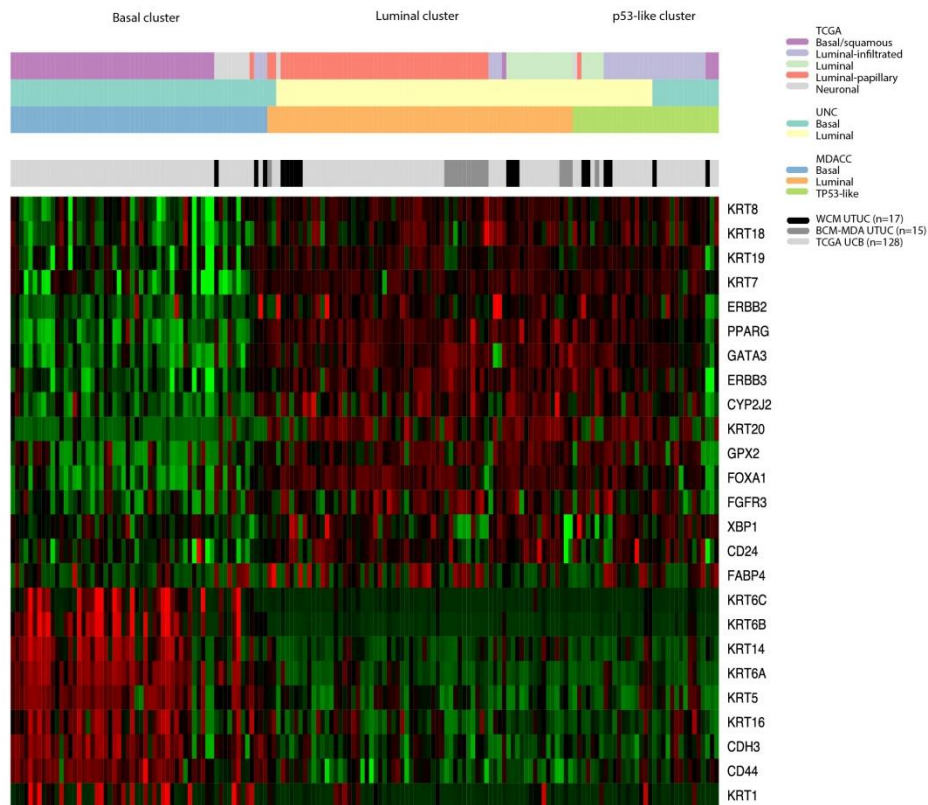

**Supplementary Figure 2 UTUC is predominantly luminal by MDACC classification.** Supervised consensus clustering and heatmap of mRNA expression data from WCM UTUC, BCM-MDA UTUC, and TCGA UCB metadataset. MDACC classifier genes are listed on the right. Assigned TCGA, MDACC, and UNC clusters are represented on top. WCM UTUC and BCM-MDA UTUC cluster with the luminal subtype (orange bars) by MDACC criteria, luminal subtype by UNC criteria (yellow bars) and luminal-papillary subtype by TCGA classification (red bars). Green = low, red = high mRNA expression.

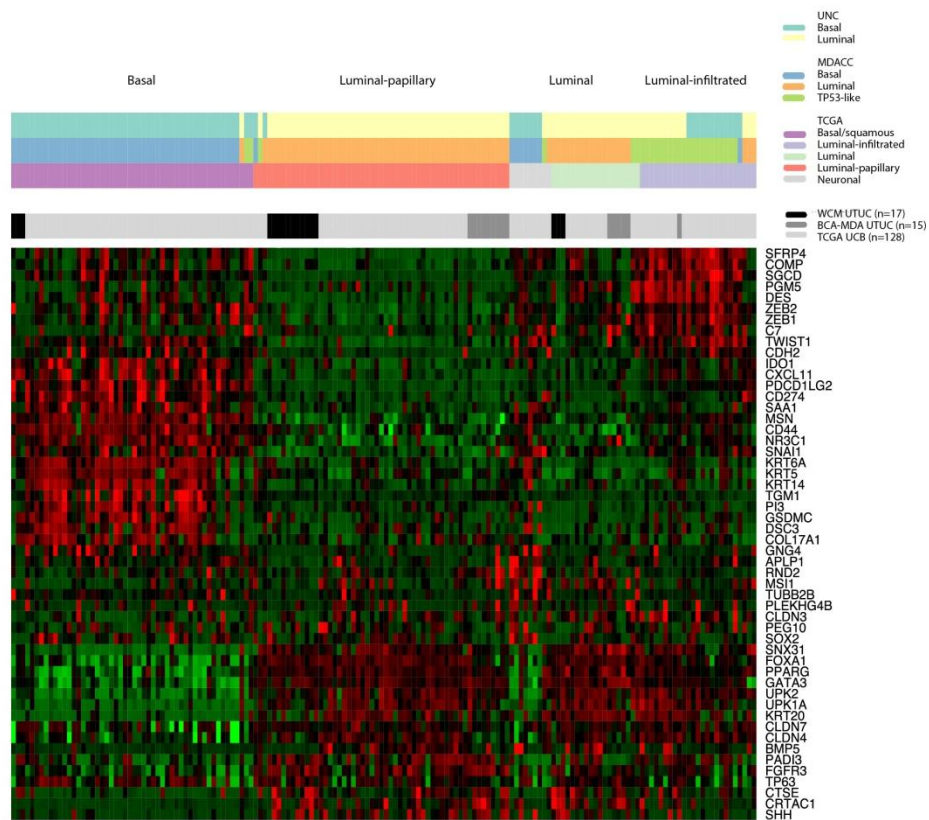

**Supplementary Figure 3 UTUC is predominantly luminal-papillary by TCGA classification.** Supervised consensus clustering and heatmap of mRNA expression from WCM UTUC, BCM-MDA UTUC, and TCGA UCB metadataset. TCGA classifier genes are listed on the right. Assigned TCGA, MDACC, and UNC clusters are represented on top. WCM UTUC and BCM-MDA UTUC cluster with the luminal-papillary subtype (red bars) by TCGA criteria, luminal subtype by UNC criteria (yellow bars) and luminal subtype by MDACC classification (orange bars). Green = low, red = high mRNA expression.

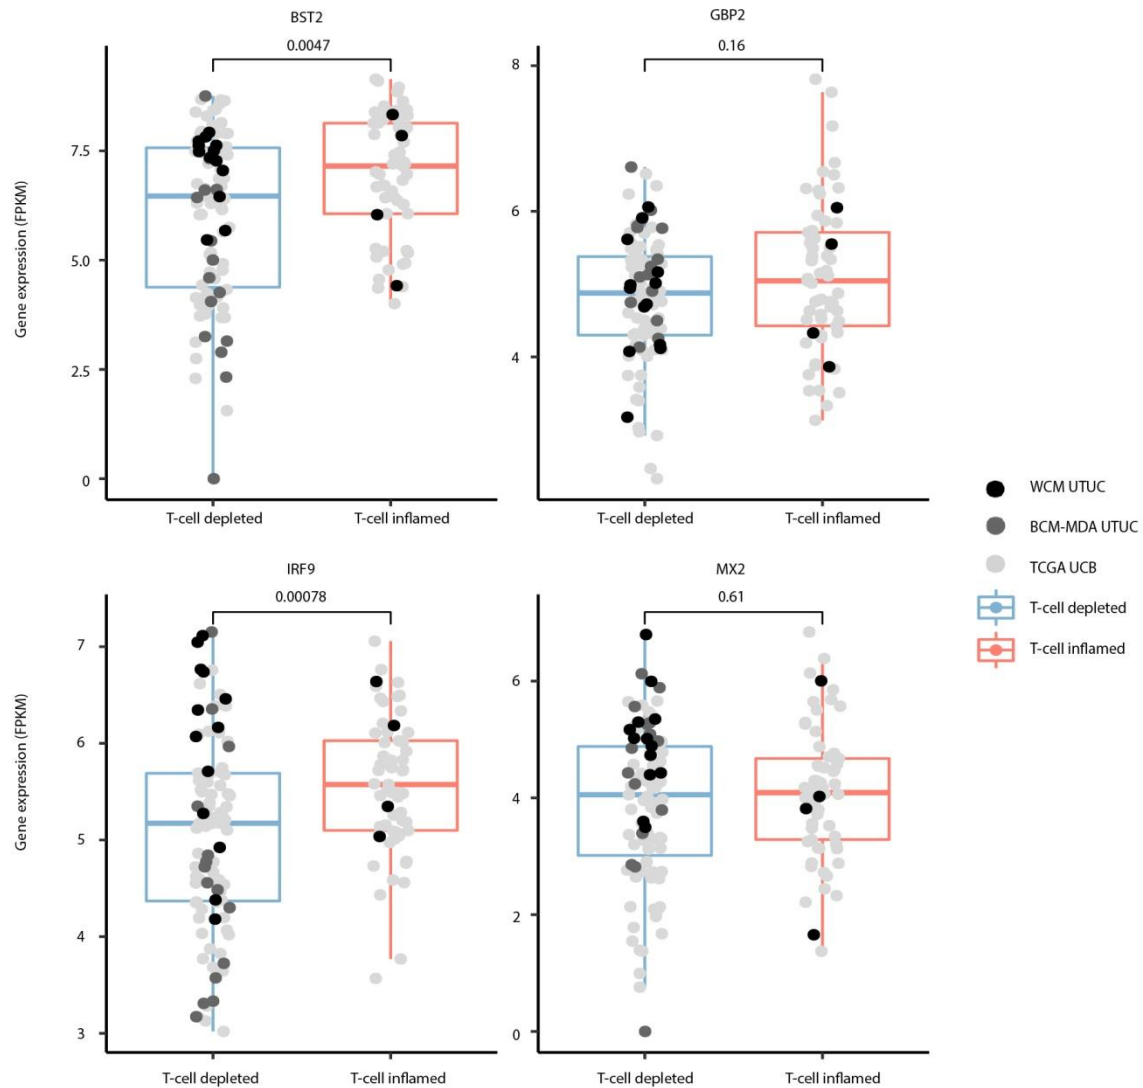

**Supplementary Figure 4. *BST2* and *IRF9* are downregulated in T-cell UTUC tumors**

Boxplots of mean expression of *BST2*, *GBP2* (upper panel), *IRF9*, and *MX2* (lower panel) genes in FPKM within the T-cell depleted versus T-cell inflamed clusters of WCM UTUC, BCM-MDA UTUC, and TCGA UCB (*BST2*: Wilcoxon test  $P = 0.0047$ ; *IRF9* Wilcoxon test  $P = 0.00078$ ). The horizontal line within the box indicates the mean, boundaries of the box indicate the 25<sup>th</sup>- and 75<sup>th</sup>-percentile, and the whiskers indicate the highest and lowest values of the results.

## Supplementary Table 1.

Patient and sample characteristics.

| UTUC ID                       | Age at diagnosis | Sex | Smoking status | Location            | pT diagnosis<br><T2 vs ≥T2 | Grade | History of bladder urothelial carcinoma | WES | RNAseq |
|-------------------------------|------------------|-----|----------------|---------------------|----------------------------|-------|-----------------------------------------|-----|--------|
| WCM UTUC 21                   | 85               | F   | Never          | Renal pelvis        | pT1                        | High  | No                                      | Yes | Yes    |
| WCM UTUC 23                   | 77               | M   | Former         | Renal pelvis        | pT4                        | High  | No                                      | Yes | No     |
| WCM UTUC 25                   | 55               | F   | Former         | Renal pelvis        | pT3                        | High  | Yes                                     | Yes | No     |
| WCM UTUC 60                   | 73               | M   | Former         | Renal pelvis        | pT1                        | High  | No                                      | Yes | No     |
| WCM UTUC 70                   | 57               | F   | Current        | Renal pelvis        | pT1                        | High  | Yes                                     | No  | Yes    |
| WCM UTUC 72                   | 75               | F   | Current        | Renal pelvis        | pT3                        | High  | Yes                                     | Yes | No     |
| WCM UTUC 73                   | 82               | M   | Unknown        | Renal pelvis        | pT3                        | High  | Yes                                     | Yes | Yes    |
| WCM UTUC 74                   | 63               | F   | Never          | Renal pelvis        | pT3                        | High  | No                                      | No  | Yes    |
| WCM UTUC 75                   | 58               | F   | Former         | Renal pelvis        | pT2                        | High  | No                                      | Yes | Yes    |
| WCM UTUC 77                   | 68               | M   | Never          | Renal pelvis        | pTa                        | High  | Yes                                     | Yes | Yes    |
| WCM UTUC 78                   | 66               | M   | Former         | Ureter              | pTa                        | High  | Yes                                     | No  | Yes    |
| WCM UTUC 80                   | 71               | M   | Former         | Renal pelvis        | pT3                        | High  | No                                      | No  | Yes    |
| WCM UTUC 82                   | 73               | M   | Former         | Renal pelvis        | pT3                        | High  | Yes                                     | No  | Yes    |
| WCM UTUC 83                   | 87               | F   | Never          | Ureter              | pT3                        | High  | Yes                                     | No  | Yes    |
| WCM UTUC 84                   | 85               | M   | Never          | Renal pelvis        | pT1                        | High  | Yes                                     | Yes | No     |
| WCM UTUC 85                   | 74               | M   | Former         | Ureter              | pT3                        | High  | Yes                                     | No  | Yes    |
| WCM UTUC 86                   | 65               | M   | Never          | Renal pelvis        | pT3                        | High  | No                                      | No  | Yes    |
| WCM UTUC 87                   | 70               | M   | Former         | Renal pelvis        | pT2                        | High  | Yes                                     | Yes | Yes    |
| WCM UTUC 89                   | 73               | M   | Former         | Renal pelvis        | pT1                        | High  | Yes                                     | Yes | Yes    |
| WCM UTUC90                    | 75               | M   | Former         | Ureter              | pT1                        | High  | No                                      | Yes | Yes    |
| WCM UTUC 91                   | 80               | F   | Never          | Renal pelvis        | pT3                        | High  | No                                      | Yes | Yes    |
| WCM UTUC 92                   | 84               | F   | Never          | Ureter              | pT4                        | High  | No                                      | Yes | Yes    |
| WCM UTUC 576                  | 74               | M   | Former         | Ureter              | pT3                        | High  | Yes                                     | Yes | No     |
| WCM UTUC 761                  | 51               | M   | Former         | Ureter              | pT1                        | High  | Yes                                     | Yes | No     |
| WCM UTUC 764                  | 73               | M   | Former         | Ureter              | pT3                        | High  | Yes                                     | Yes | No     |
| WCM UTUC 784                  | 64               | M   | Former         | Renal pelvis        | pT4                        | High  | No                                      | Yes | No     |
| WCM UTUC 805                  | 81               | M   | Former         | Renal pelvis        | pT3                        | High  | Yes                                     | Yes | No     |
| WCM UTUC 885                  | 81               | M   | Former         | Ureter              | pT3                        | High  | No                                      | Yes | No     |
| WCMUTUC1099                   | 73               | F   | Former         | Renal pelvis        | pT4                        | High  | No                                      | Yes | No     |
| WCM UTUC 1399                 | 82               | M   | Former         | Renal pelvis        | pT3                        | High  | No                                      | Yes | No     |
| BCM-MDA 01<br>(IPCT-KC5-6867) | 68               | F   | Never          | Ureter              | pT3                        | High  | Yes                                     | Yes | Yes    |
| BCM-MDA 05<br>(IPCT-KC5-7975) | 88               | F   | Never          | Renal pelvis        | pTa                        | High  | No                                      | Yes | Yes    |
| BCM-MDA 09<br>(IPCT-KC5-7982) | 83               | M   | Former         | Renal Pelvis/Ureter | pT3                        | High  | Yes                                     | Yes | Yes    |
| BCM-MDA 10<br>(IPCT-KC5-7983) | 57               | M   | Never          | Renal pelvis        | pT1                        | High  | No                                      | Yes | Yes    |
| BCM-MDA 12<br>(IPCT-KC5-7987) | 58               | F   | Former         | Renal pelvis        | pT3                        | High  | No                                      | Yes | Yes    |
| BCM-MDA 14<br>(IPCT-KC5-7990) | 77               | M   | Never          | Renal pelvis        | cTa                        | High  | No                                      | Yes | Yes    |

|                                 |    |   |         |                     |     |      |     |     |     |
|---------------------------------|----|---|---------|---------------------|-----|------|-----|-----|-----|
| BCM-MDA 16<br>(IPCT-KC5-7994)   | 76 | M | Former  | Renal pelvis        | pT1 | High | No  | Yes | Yes |
| BCM-MDA 17<br>(IPCT-KC5-7996)   | 62 | M | Former  | Renal Pelvis/Ureter | pT2 | High | No  | Yes | Yes |
| BCM-MDA 18<br>(IPCT-KC5-7997)   | 76 | M | Current | Renal pelvis        | pT1 | High | No  | Yes | Yes |
| BCM-MDA 20<br>(IPCT-KC5-7999)   | 74 | F | Never   | Renal pelvis/Ureter | pT1 | High | Yes | Yes | Yes |
| BCM-MDA 21<br>(UTUC-CAN-000203) | 73 | M | Current | Renal pelvis        | pT1 | High | Yes | Yes | Yes |
| BCM-MDA 22<br>(UTUC-CAN-000204) | 78 | M | Current | Renal pelvis        | pT4 | High | No  | Yes | Yes |
| BCM-MDA 24<br>(UTUC-CAN-000207) | 70 | M | Current | Ureter              | pT3 | High | No  | Yes | Yes |
| BCM-MDA 26<br>(UTUC-CAN-000223) | 87 | M | Current | Ureter              | pT2 | High | No  | No  | Yes |
| BCM-MDA 28<br>(UTUC-CAN-000225) | 80 | F | Current | Ureter              | pT2 | High | No  | No  | Yes |
| BCM-MDA 29<br>(IPCT-KC5-7988)   | 83 | M | Never   | Renal pelvis/Ureter | pT4 | High | No  | Yes | No  |
| BCM-MDA 30<br>(IPCT-KC5-7995)   | 81 | M | Never   | Renal pelvis        | pT3 | High | No  | Yes | No  |

## Supplementary Table 2.

Inferred molecular subtypes per signature criteria, based on the UNC, MDACC, and TCGA classifier subtype of the sample with which highest Spearman correlation was found.

| Type                  | SampleID    | UNC     | MDACC     | TCGA                |
|-----------------------|-------------|---------|-----------|---------------------|
| <b>UNC criteria</b>   |             |         |           |                     |
| BCM-MDA               | BCM-MDA 09  | Basal   | Basal     | Basal squamous      |
| BCM-MDA               | BCM-MDA 24  | Basal   | TP53-like | Luminal infiltrated |
| WCM                   | WCM UTUC 74 | Basal   | Basal     | Basal squamous      |
| WCM                   | WCM UTUC 75 | Basal   | Basal     | Basal squamous      |
| WCM                   | WCM UTUC 92 | Basal   | Basal     | Neuronal            |
| BCM-MDA               | BCM-MDA 01  | Luminal | Luminal   | Luminal             |
| BCM-MDA               | BCM-MDA 05  | Luminal | Luminal   | Luminal papillary   |
| BCM-MDA               | BCM-MDA 10  | Luminal | Luminal   | Luminal papillary   |
| BCM-MDA               | BCM-MDA 12  | Luminal | Luminal   | Luminal papillary   |
| BCM-MDA               | BCM-MDA 14  | Luminal | Luminal   | Luminal papillary   |
| BCM-MDA               | BCM-MDA 16  | Luminal | Luminal   | Luminal papillary   |
| BCM-MDA               | BCM-MDA 17  | Luminal | Luminal   | Luminal papillary   |
| BCM-MDA               | BCM-MDA 18  | Luminal | Luminal   | Luminal papillary   |
| BCM-MDA               | BCM-MDA 20  | Luminal | Luminal   | Luminal papillary   |
| BCM-MDA               | BCM-MDA 21  | Luminal | Luminal   | Luminal papillary   |
| BCM-MDA               | BCM-MDA 22  | Luminal | Luminal   | Luminal             |
| BCM-MDA               | BCM-MDA 26  | Luminal | Luminal   | Luminal papillary   |
| BCM-MDA               | BCM-MDA 28  | Luminal | Luminal   | Luminal             |
| WCM                   | WCM UTUC 21 | Luminal | TP53-like | Luminal papillary   |
| WCM                   | WCM UTUC 70 | Luminal | Luminal   | Luminal papillary   |
| WCM                   | WCM UTUC 73 | Luminal | Luminal   | Luminal papillary   |
| WCM                   | WCM UTUC 77 | Luminal | Luminal   | Luminal papillary   |
| WCM                   | WCM UTUC 78 | Luminal | Luminal   | Luminal papillary   |
| WCM                   | WCM UTUC 80 | Luminal | Luminal   | Luminal papillary   |
| WCM                   | WCM UTUC 82 | Luminal | Luminal   | Luminal papillary   |
| WCM                   | WCM UTUC 83 | Luminal | Luminal   | Luminal papillary   |
| WCM                   | WCM UTUC 85 | Luminal | TP53-like | Luminal infiltrated |
| WCM                   | WCM UTUC 86 | Luminal | Luminal   | Luminal papillary   |
| WCM                   | WCM UTUC 87 | Luminal | Luminal   | Luminal papillary   |
| WCM                   | WCM UTUC 89 | Luminal | Luminal   | Luminal papillary   |
| WCM                   | WCM UTUC 90 | Luminal | Luminal   | Luminal papillary   |
| WCM                   | WCM UTUC 91 | Luminal | Luminal   | Luminal papillary   |
| <b>MDACC criteria</b> |             |         |           |                     |
| WCM                   | WCM UTUC 74 | Basal   | Basal     | Luminal infiltrated |
| WCM                   | WCM UTUC 75 | Basal   | Basal     | Luminal infiltrated |
| WCM                   | WCM UTUC 80 | Basal   | Basal     | Neuronal            |
| BCM-MDA               | BCM-MDA 24  | Basal   | Luminal   | Luminal papillary   |



|                      |             |         |           |                     |
|----------------------|-------------|---------|-----------|---------------------|
| BCM-MDA              | BCM-MDA 01  | Luminal | Luminal   | Luminal             |
| BCM-MDA              | BCM-MDA 17  | Luminal | Luminal   | Luminal             |
| BCM-MDA              | BCM-MDA 22  | Luminal | Luminal   | Luminal             |
| WCM                  | WCM UTUC 21 | Luminal | Luminal   | Luminal             |
| WCM                  | WCM UTUC 78 | Luminal | Luminal   | Luminal             |
| WCM                  | WCM UTUC 83 | Luminal | Luminal   | Luminal             |
| BCM-MDA              | BCM-MDA 05  | Luminal | Luminal   | Luminal papillary   |
| BCM-MDA              | BCM-MDA 09  | Luminal | Luminal   | Luminal papillary   |
| BCM-MDA              | BCM-MDA 12  | Luminal | Luminal   | Luminal papillary   |
| BCM-MDA              | BCM-MDA 14  | Luminal | Luminal   | Luminal papillary   |
| BCM-MDA              | BCM-MDA 16  | Luminal | Luminal   | Luminal papillary   |
| BCM-MDA              | BCM-MDA 18  | Luminal | Luminal   | Luminal papillary   |
| BCM-MDA              | BCM-MDA 20  | Luminal | Luminal   | Luminal papillary   |
| BCM-MDA              | BCM-MDA 21  | Luminal | Luminal   | Luminal papillary   |
| BCM-MDA              | BCM-MDA 26  | Luminal | Luminal   | Luminal papillary   |
| BCM-MDA              | BCM-MDA 28  | Luminal | Luminal   | Luminal papillary   |
| WCM                  | WCM UTUC 77 | Luminal | Luminal   | Luminal papillary   |
| WCM                  | WCM UTUC 86 | Luminal | Luminal   | Luminal papillary   |
| WCM                  | WCM UTUC 87 | Luminal | Luminal   | Luminal papillary   |
| WCM                  | WCM UTUC 89 | Luminal | Luminal   | Luminal papillary   |
| WCM                  | WCM UTUC 91 | Luminal | Luminal   | Luminal papillary   |
| WCM                  | WCM UTUC 92 | Basal   | TP53-like | Basal squamous      |
| WCM                  | WCM UTUC 85 | Basal   | TP53-like | Luminal infiltrated |
| BCM-MDA              | BCM-MDA 10  | Luminal | TP53-like | Luminal             |
| WCM                  | WCM UTUC 70 | Luminal | TP53-like | Luminal             |
| WCM                  | WCM UTUC 82 | Luminal | TP53-like | Luminal             |
| WCM                  | WCM UTUC 73 | Luminal | TP53-like | Luminal infiltrated |
| WCM                  | WCM UTUC 90 | Luminal | TP53-like | Luminal infiltrated |
| <hr/>                |             |         |           |                     |
| <b>TCGA criteria</b> |             |         |           |                     |
| WCM                  | WCM UTUC 74 | Basal   | Basal     | Basal squamous      |
| WCM                  | WCM UTUC 75 | Basal   | Basal     | Basal squamous      |
| WCM                  | WCM UTUC 92 | Basal   | Basal     | Basal squamous      |
| BCM-MDA              | BCM-MDA 14  | Luminal | Luminal   | Luminal             |
| BCM-MDA              | BCM-MDA 17  | Luminal | Luminal   | Luminal             |
| BCM-MDA              | BCM-MDA 21  | Luminal | Luminal   | Luminal             |
| BCM-MDA              | BCM-MDA 22  | Luminal | Luminal   | Luminal             |
| BCM-MDA              | BCM-MDA 28  | Luminal | Luminal   | Luminal             |
| WCM                  | WCM UTUC 78 | Luminal | Luminal   | Luminal             |
| WCM                  | WCM UTUC 83 | Luminal | Luminal   | Luminal             |
| WCM                  | WCM UTUC 85 | Luminal | Luminal   | Luminal             |
| BCM-MDA              | BCM-MDA 24  | Luminal | TP53-like | Luminal infiltrated |
| BCM-MDA              | BCM-MDA 01  | Luminal | Luminal   | Luminal papillary   |
| BCM-MDA              | BCM-MDA 05  | Luminal | Luminal   | Luminal papillary   |
| BCM-MDA              | BCM-MDA 09  | Luminal | Luminal   | Luminal papillary   |
| BCM-MDA              | BCM-MDA 10  | Luminal | Luminal   | Luminal papillary   |

|         |             |         |         |                   |
|---------|-------------|---------|---------|-------------------|
| BCM-MDA | BCM-MDA 12  | Luminal | Luminal | Luminal papillary |
| BCM-MDA | BCM-MDA 16  | Luminal | Luminal | Luminal papillary |
| BCM-MDA | BCM-MDA 18  | Luminal | Luminal | Luminal papillary |
| BCM-MDA | BCM-MDA 20  | Luminal | Luminal | Luminal papillary |
| BCM-MDA | BCM-MDA 26  | Luminal | Luminal | Luminal papillary |
| WCM     | WCM UTUC 21 | Luminal | Luminal | Luminal papillary |
| WCM     | WCM UTUC 70 | Luminal | Luminal | Luminal papillary |
| WCM     | WCM UTUC 73 | Luminal | Luminal | Luminal papillary |
| WCM     | WCM UTUC 77 | Luminal | Luminal | Luminal papillary |
| WCM     | WCM UTUC 80 | Luminal | Luminal | Luminal papillary |
| WCM     | WCM UTUC 82 | Luminal | Luminal | Luminal papillary |
| WCM     | WCM UTUC 86 | Luminal | Luminal | Luminal papillary |
| WCM     | WCM UTUC 87 | Luminal | Luminal | Luminal papillary |
| WCM     | WCM UTUC 89 | Luminal | Luminal | Luminal papillary |
| WCM     | WCM UTUC 90 | Luminal | Luminal | Luminal papillary |
| WCM     | WCM UTUC 91 | Luminal | Luminal | Luminal papillary |

---

### Supplementary Table 3.

Immune gene signature of 170 genes related to immune signaling that were differentially expressed between UTUC (WCM, BCM-MDA) and TCGA UCB.

|                 |                 |               |                |                |                 |                 |                |                 |                 |
|-----------------|-----------------|---------------|----------------|----------------|-----------------|-----------------|----------------|-----------------|-----------------|
| <i>MIR650</i>   | <i>FCGR3A</i>   | <i>IDO1</i>   | <i>ALOX5AP</i> | <i>SLC15A3</i> | <i>C3AR1</i>    | <i>ELK2AP</i>   | <i>HAVCR2</i>  | <i>PILRA</i>    | <i>EVI2A</i>    |
| <i>IGJ</i>      | <i>C1R</i>      | <i>IFI30</i>  | <i>CD3E</i>    | <i>LTB</i>     | <i>PTPRC</i>    | <i>PLA2G7</i>   | <i>RASSF4</i>  | <i>IL4I1</i>    | <i>CYTH4</i>    |
| <i>IGLL5</i>    | <i>HLA-DPA1</i> | <i>ITGB2</i>  | <i>CPVL</i>    | <i>HLA-DMA</i> | <i>ACP5</i>     | <i>CD79A</i>    | <i>NCKAP1L</i> | <i>GZMH</i>     | <i>ADAP2</i>    |
| <i>CXCL10</i>   | <i>CD74</i>     | <i>GZMB</i>   | <i>GNLY</i>    | <i>CD37</i>    | <i>CD4</i>      | <i>WIPF1</i>    | <i>IL10RA</i>  | <i>TRPV2</i>    | <i>ABI3</i>     |
| <i>CXCL9</i>    | <i>HLA-DQB1</i> | <i>TYROBP</i> | <i>NKG7</i>    | <i>CCL3</i>    | <i>HCK</i>      | <i>RNASE6</i>   | <i>MSR1</i>    | <i>CCR1</i>     | <i>ITGAX</i>    |
| <i>LYZ</i>      | <i>SERPING1</i> | <i>IL2RG</i>  | <i>CD2</i>     | <i>TREM2</i>   | <i>LCP2</i>     | <i>CD48</i>     | <i>F13A1</i>   | <i>SAMSN1</i>   | <i>RCSD1</i>    |
| <i>UBD</i>      | <i>HLA-DQA2</i> | <i>LAPTM5</i> | <i>GZMA</i>    | <i>MS4A6A</i>  | <i>CLEC7A</i>   | <i>HCST</i>     | <i>SASH3</i>   | <i>IGSF6</i>    | <i>TBXAS1</i>   |
| <i>C1S</i>      | <i>TMEM176A</i> | <i>C2</i>     | <i>CD3D</i>    | <i>CD7</i>     | <i>EVI2B</i>    | <i>CORO1A</i>   | <i>SLAMF8</i>  | <i>SLC7A7</i>   | <i>LY86</i>     |
| <i>C1QB</i>     | <i>TMEM176B</i> | <i>CCL4</i>   | <i>NCF2</i>    | <i>FYB</i>     | <i>SDS</i>      | <i>SLAMF7</i>   | <i>SLA</i>     | <i>CD86</i>     | <i>DOCK2</i>    |
| <i>CXCL13</i>   | <i>CCL5</i>     | <i>SRGN</i>   | <i>CYBB</i>    | <i>SLCO2B1</i> | <i>HLA-DQB2</i> | <i>C1orf162</i> | <i>LST1</i>    | <i>WAS</i>      | <i>MYO1F</i>    |
| <i>C1QC</i>     | <i>HLA-DMB</i>  | <i>CD52</i>   | <i>VSIG4</i>   | <i>WARS</i>    | <i>FGL2</i>     | <i>PRF1</i>     | <i>GZMK</i>    | <i>STAB1</i>    | <i>PIK3AP1</i>  |
| <i>HLA-DRB1</i> | <i>RGS1</i>     | <i>FPR3</i>   | <i>GBP5</i>    | <i>MS4A4A</i>  | <i>SELPLG</i>   | <i>MNDA</i>     | <i>BCL2A1</i>  | <i>CD300A</i>   | <i>PTPN7</i>    |
| <i>HLA-DRA</i>  | <i>FCGR2A</i>   | <i>RNASE1</i> | <i>SPI1</i>    | <i>AIF1</i>    | <i>C5AR1</i>    | <i>CCL13</i>    | <i>CYTIP</i>   | <i>SPOCK2</i>   | <i>ITGAM</i>    |
| <i>HLA-DRB5</i> | <i>CD14</i>     | <i>CD53</i>   | <i>CCL19</i>   | <i>CST7</i>    | <i>FAM26F</i>   | <i>LAIR1</i>    | <i>LAG3</i>    | <i>CD8A</i>     | <i>ADAMDEC1</i> |
| <i>CCL21</i>    | <i>HLA-DRB6</i> | <i>MZB1</i>   | <i>FOLR2</i>   | <i>FPR1</i>    | <i>HLA-DOA</i>  | <i>IL2RB</i>    | <i>CIITA</i>   | <i>S100B</i>    | <i>OSCAR</i>    |
| <i>C1QA</i>     | <i>FCER1G</i>   | <i>CD163</i>  | <i>IL7R</i>    | <i>LY96</i>    | <i>PLEK</i>     | <i>IRF8</i>     | <i>FERMT3</i>  | <i>TNFSF13B</i> | <i>HK3</i>      |
| <i>HLA-DQA1</i> | <i>HLA-DPB1</i> | <i>CXCL11</i> | <i>CSF1R</i>   | <i>MAFB</i>    | <i>GPR183</i>   | <i>MPEG1</i>    | <i>DOK2</i>    | <i>ARHGAP9</i>  | <i>LAT2</i>     |

## Supplementary Table 4.

Primers, reaction components, and conditions for the quantitative real-time PCR in RT-112, RT-4, and SW780 cell lines.

| <b>qPCR primers</b>                   |                  |                        |
|---------------------------------------|------------------|------------------------|
| Name                                  | Sequence (5'-3') |                        |
| b-actin                               | F                | TCCCTGGAGAAGAGCTACG    |
|                                       | R                | GTAGTTTCGTGGATGCCACA   |
| <i>BST2</i><br>#1                     | F                | CCGTCCTGCTCGGCTTT      |
|                                       | R                | CCGCTCAGAACTGATGAGATCA |
| <i>BST2</i><br>#2                     | F                | ACGCGTCTGCAGAGGTGGAG   |
|                                       | R                | GCAGCGGAGCTGGAGTCCT    |
| <b>Reaction component (384 plate)</b> |                  |                        |
| SYBR Green Mix<br>(2X)                | 5                |                        |
| Forward Primer<br>(10uM)              | 0.25             |                        |
| Reverse Primer<br>(10uM)              | 0.25             |                        |
| Template                              | 50ng             |                        |
| Nuclease-free water                   | To 10ul          |                        |
| <b>qPCR condition (40 Cycles)</b>     |                  |                        |
| 95C                                   | 10min            |                        |
| 95C                                   | 15sec            |                        |
| 55C                                   | 30sec            |                        |
| 60C                                   | 30sec            |                        |
